# Supplementary material for: Low-cost and high-power K4[Mn2Fe](PO4)2(P2O7) as a novel cathode with outstanding cyclability for K-ion batteries
Source: Royal Society of Chemistry journal article supplement (doi:10.1039/d1ta01602d), 2021-01-01
Supplement: d1ta01602d1.pdf [file d1ta01602d1.pdf]

## Supporting Information

### **Low-cost and High-power $K_4[Mn_2Fe](PO_4)_2(P_2O_7)$ as a novel cathode with outstanding cyclability for K-ion batteries**

*Jungmin Kang*<sup>‡<sup>a</sup></sup>, *Hyunyoung Park*<sup>‡<sup>a</sup></sup>, *Wonseok Ko*<sup>a</sup>, *Yongseok Lee*<sup>a</sup>, *Jinho Ahn*<sup>a</sup>, *Jung-Keun Yoo*<sup>b</sup>, *Seok Hyun Song*<sup>c</sup>, *Hyungsub Kim*<sup>\*c</sup> and *Jongsoon Kim*<sup>\*a</sup>

<sup>a</sup>Department of Energy Science, Sungkyunkwan University, Suwon, 440-746, Republic of Korea

<sup>b</sup>Carbon Composites Department, Composites Research Division, Korea Institute of Materials Science (KIMS), 797 Changwondaero, Changwon, Republic of Korea

<sup>c</sup>Korea Atomic Energy Research Institute (KAERI), Daedeok-daero 989 Beon-Gil, Yuseong-gu, Daejeon, 34057, Republic of Korea

<sup>‡</sup> *These authors contributed equally to this work.*

Corresponding Authors: Dr. Hyungsub Kim ([hyungsubkim@kaeri.re.kr](mailto:hyungsubkim@kaeri.re.kr)), Prof. Jongsoon Kim ([jongsoonkim@skku.edu](mailto:jongsoonkim@skku.edu)).

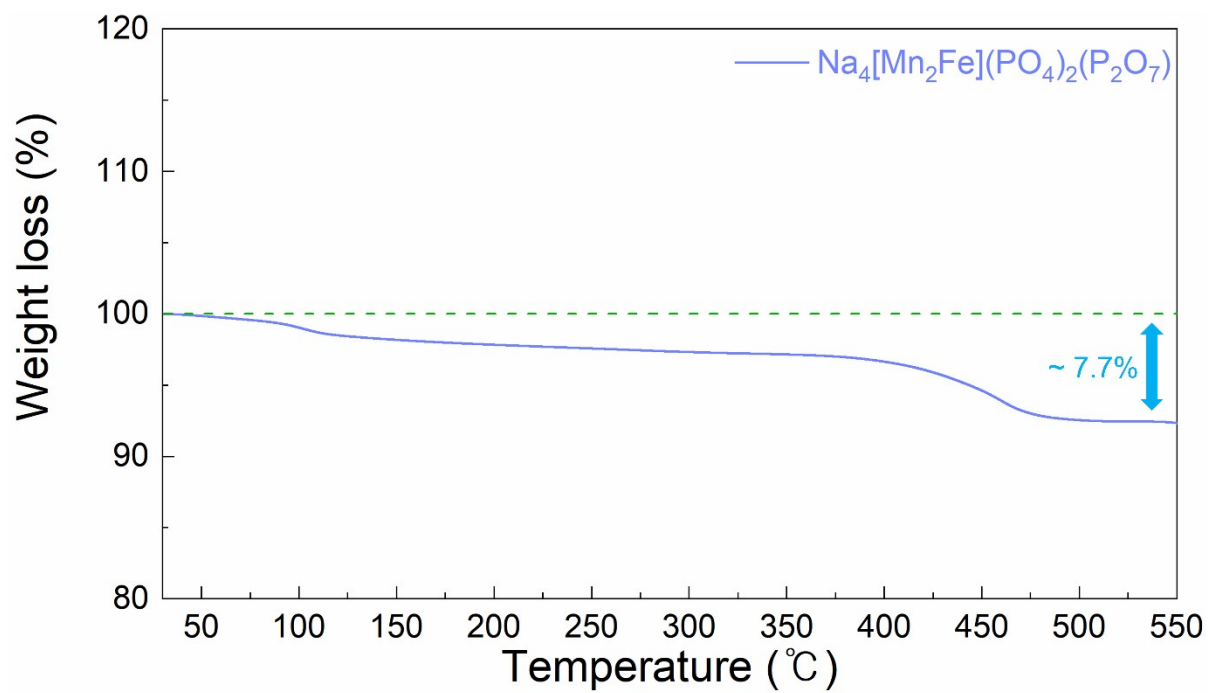

**Fig. S1.** TGA analysis of pristine  $\text{Na}_4[\text{Mn}_2\text{Fe}](\text{PO}_4)_2(\text{P}_2\text{O}_7)$  composite between 30°C and 550°C.

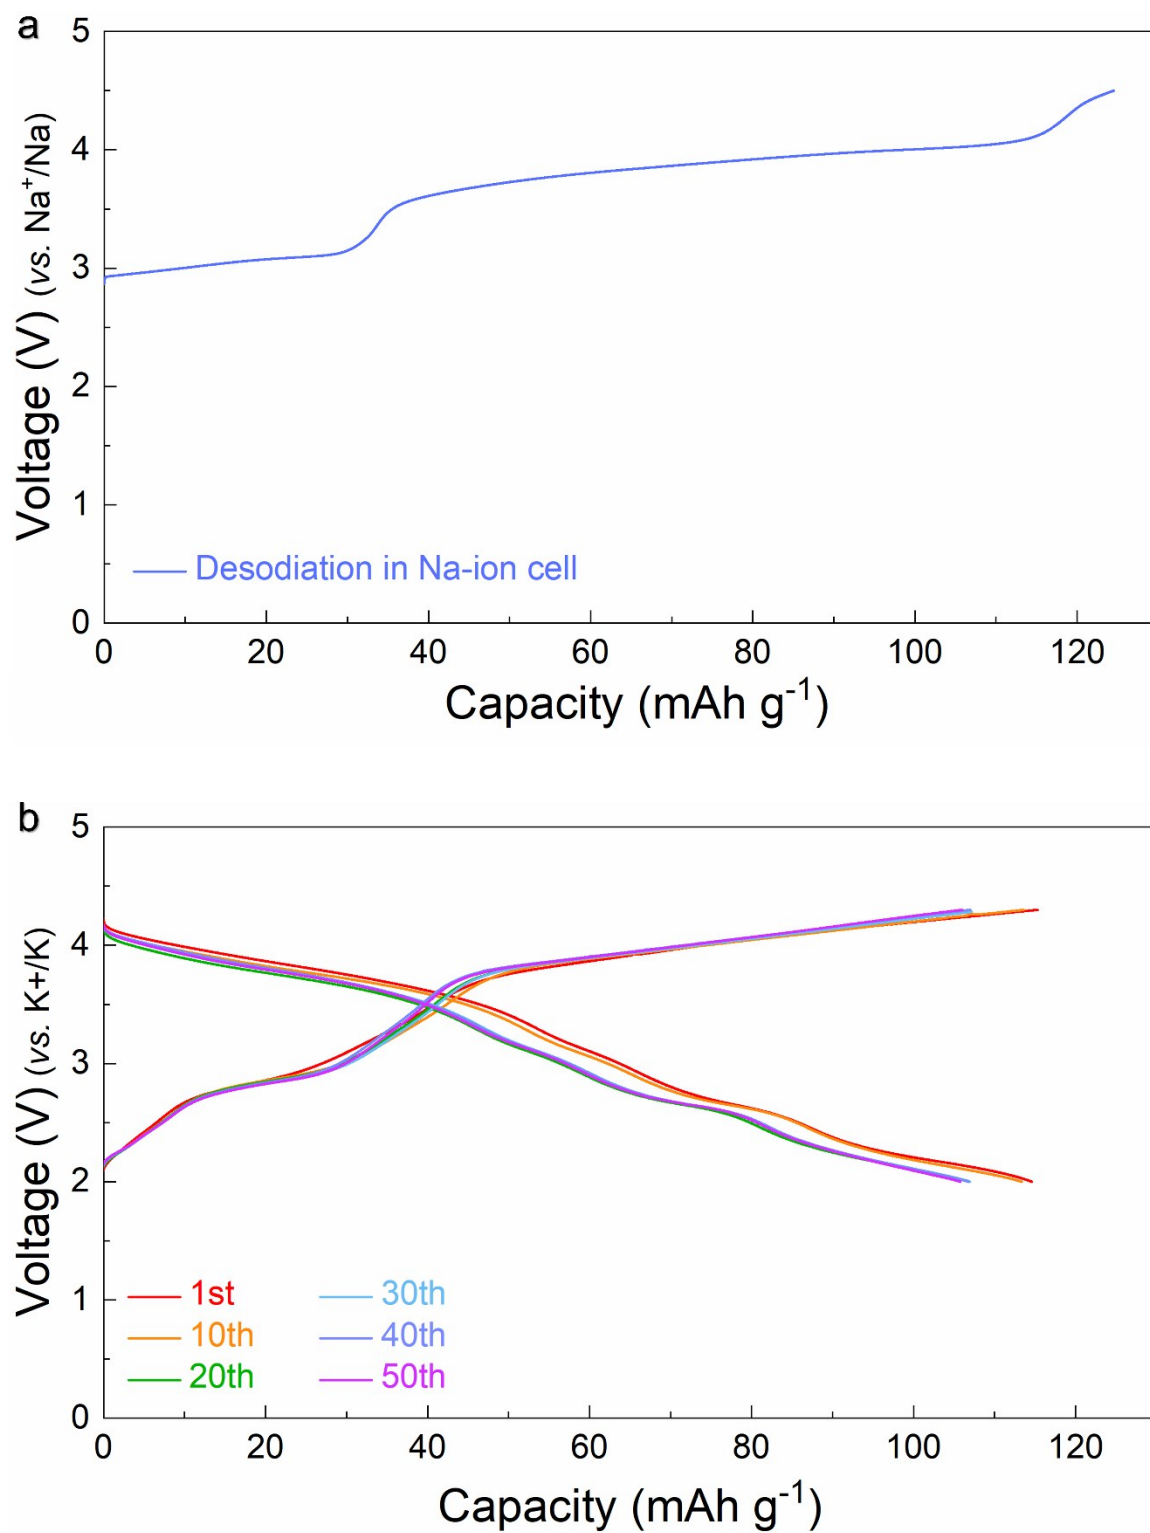

**Fig. S2.** (a) Electrochemical profiles of  $\text{Na}_4[\text{Mn}_2\text{Fe}](\text{PO}_4)_2(\text{P}_2\text{O}_7)$  during desodiation process. (b) Electrochemical profiles of  $\text{K}_4[\text{Mn}_2\text{Fe}](\text{PO}_4)_2(\text{P}_2\text{O}_7)$  during  $\text{Na}^+/\text{K}^+$  ion-exchange process for 50 cycles.

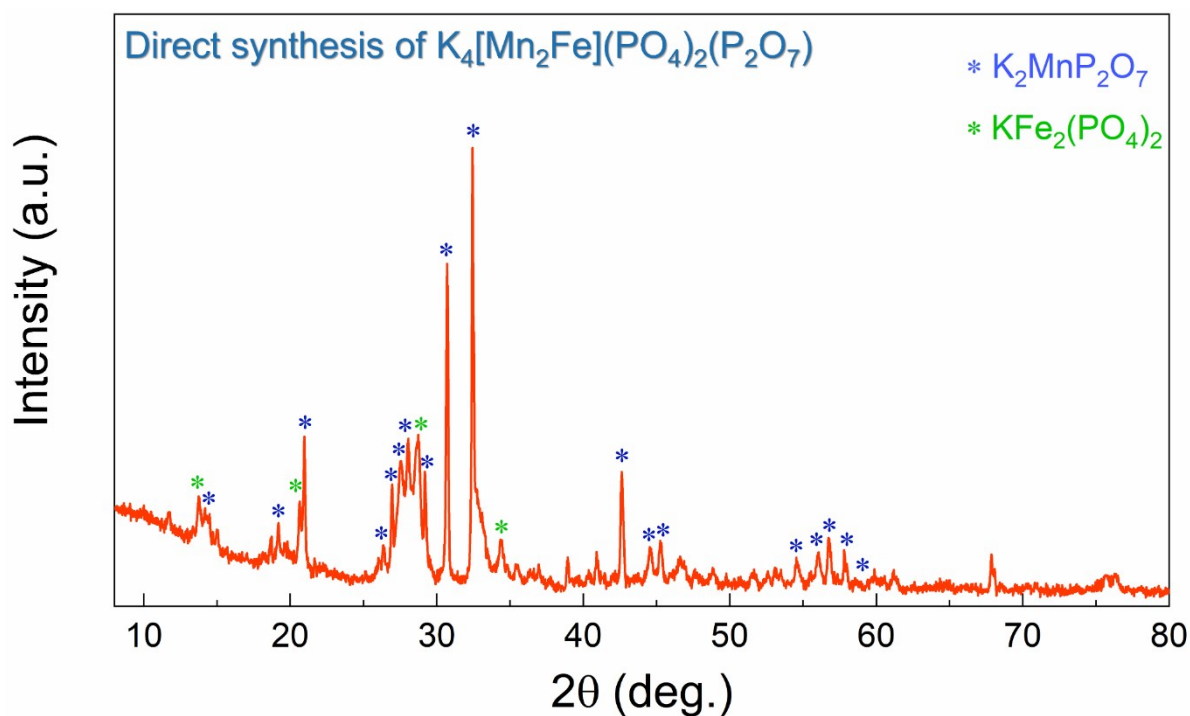

**Fig. S3.** XRD pattern of sample obtained by direct synthesis of  $K_4[Mn_2Fe](PO_4)_2(P_2O_7)$ .  $K_4P_2O_7$  (97%, Sigma Aldrich),  $MnC_2O_4 \cdot 2H_2O$  (Alfa Aesar, 93%),  $FeC_2O_4 \cdot 2H_2O$  (99%, Sigma Aldrich), and  $NH_4H_2PO_4$  (Daejung, 98%) in a molar ratio of 1:2:1:2 were used as precursors, and 5 wt% pyromellitic acid (PA,  $C_6H_{10}O_2$ ) (Alfa Aesar, 96%) was additionally prepared. The precursors were mixed by high-energy ball milling for 12 h and sealed in an Ar-filled glove box. The mixed powder was calcined at 300°C under Ar flow to remove the organic residues. After calcination, the 5 wt% PA was added and mixed, and the powder was pelletized. The pelletized sample was sintered at 550°C for 12 h under Ar flow.

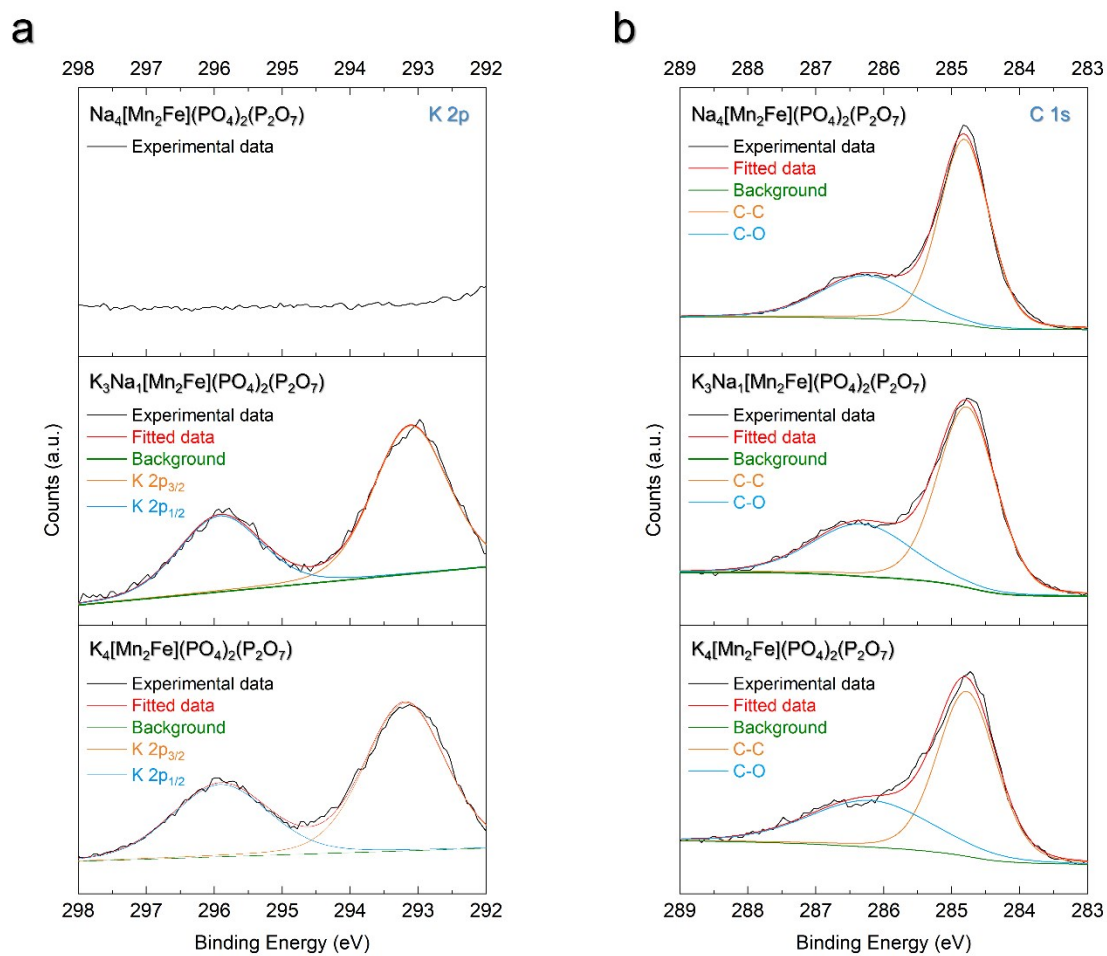

**Fig. S4.** XPS spectra of  $\text{Na}_4[\text{Mn}_2\text{Fe}](\text{PO}_4)_2(\text{P}_2\text{O}_7)$ ,  $\text{K}_3\text{Na}_1[\text{Mn}_2\text{Fe}](\text{PO}_4)_2(\text{P}_2\text{O}_7)$  and  $\text{K}_4[\text{Mn}_2\text{Fe}](\text{PO}_4)_2(\text{P}_2\text{O}_7)$  during ion-exchange process: (a) K 2p ( $2p_{1/2}$ : 293.1 eV and  $2p_{3/2}$ : 295.9 eV) and (b) C 1s peaks (C-C: 284.78 eV and C-O: 286.2 eV).<sup>1,2</sup>

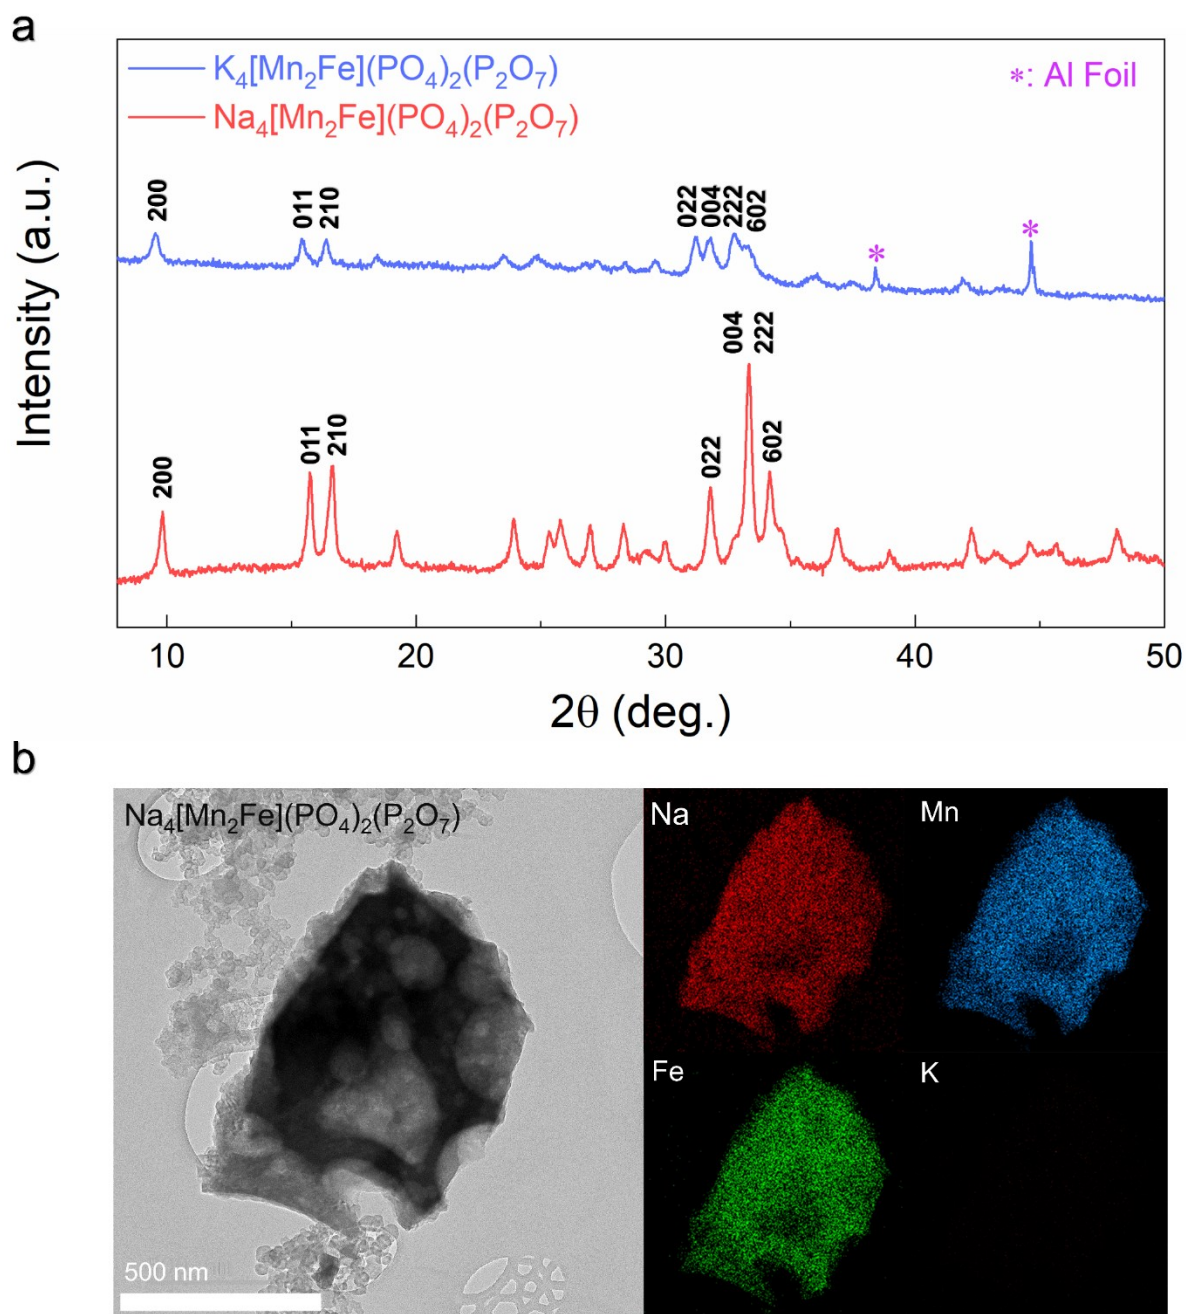

**Fig. S5.** Characterization of  $Na_4[Mn_2Fe](PO_4)_2(P_2O_7)$  and  $K_4[Mn_2Fe](PO_4)_2(P_2O_7)$ : (a) XRD patterns in the range of  $8^\circ$ – $50^\circ$  and (b) TEM and corresponding EDS mapping of Na, Mn, Fe, and K elements.

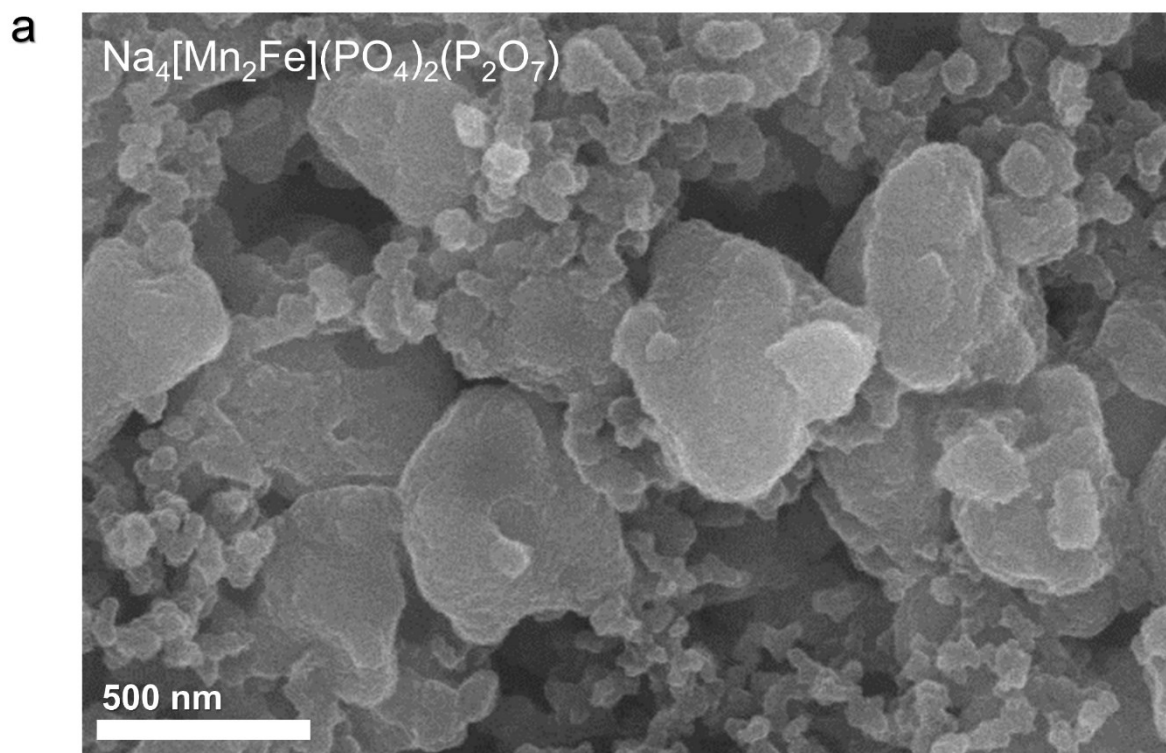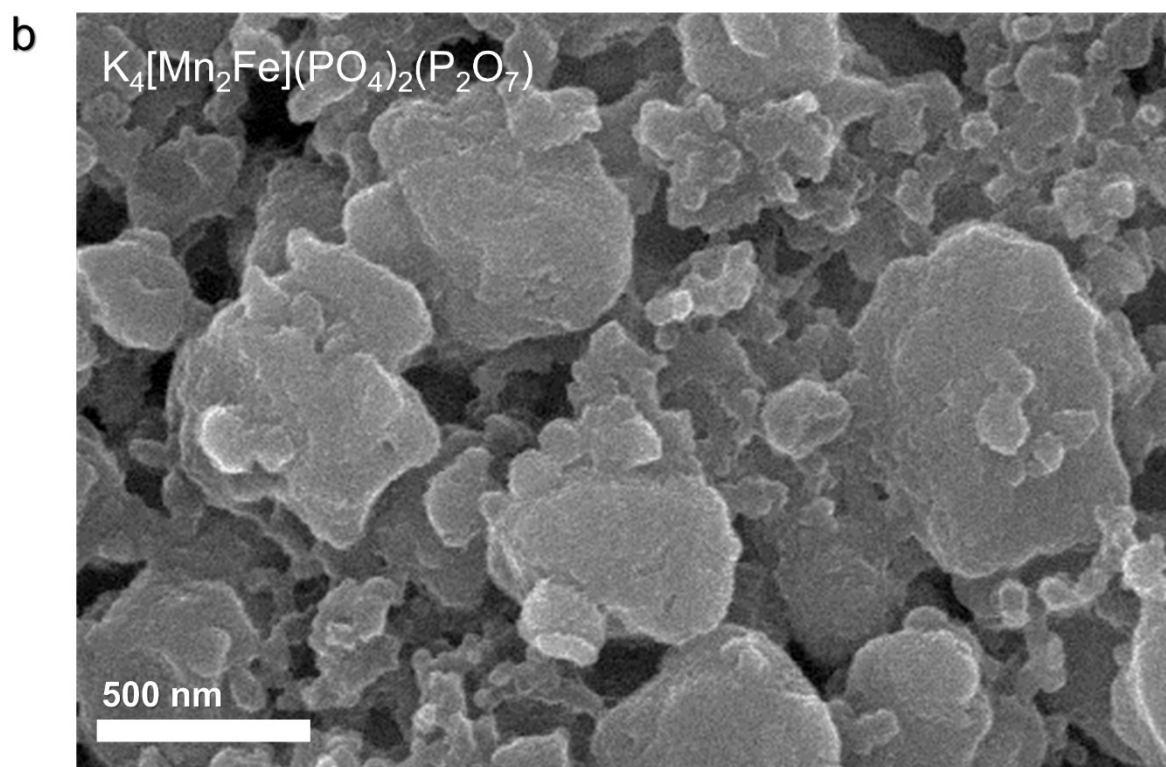

**Fig. S6.** SEM images of (a)  $\text{Na}_4[\text{Mn}_2\text{Fe}](\text{PO}_4)_2(\text{P}_2\text{O}_7)$  and (b)  $\text{K}_4[\text{Mn}_2\text{Fe}](\text{PO}_4)_2(\text{P}_2\text{O}_7)$ .

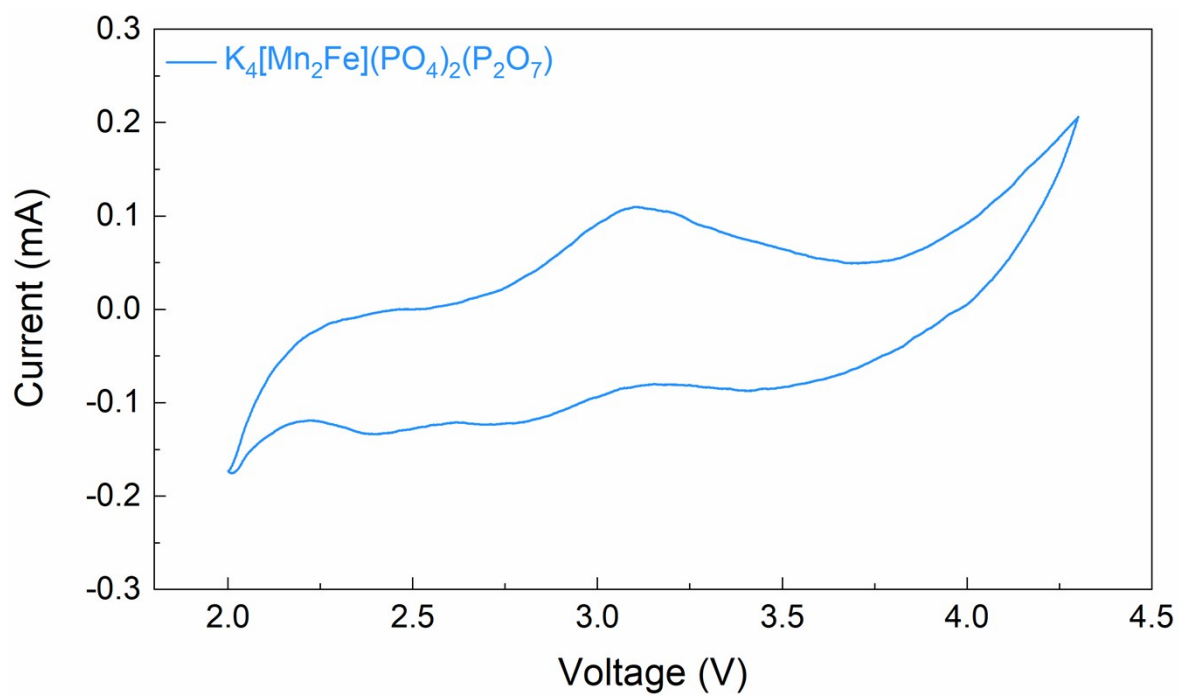

**Fig. S7.** CV profiles of  $\text{K}_4[\text{Mn}_2\text{Fe}](\text{PO}_4)_2(\text{P}_2\text{O}_7)$  with a scan rate of at 1 mV s<sup>-1</sup> at the voltage range of 2.0-4.3V (vs. K<sup>+</sup>/K).



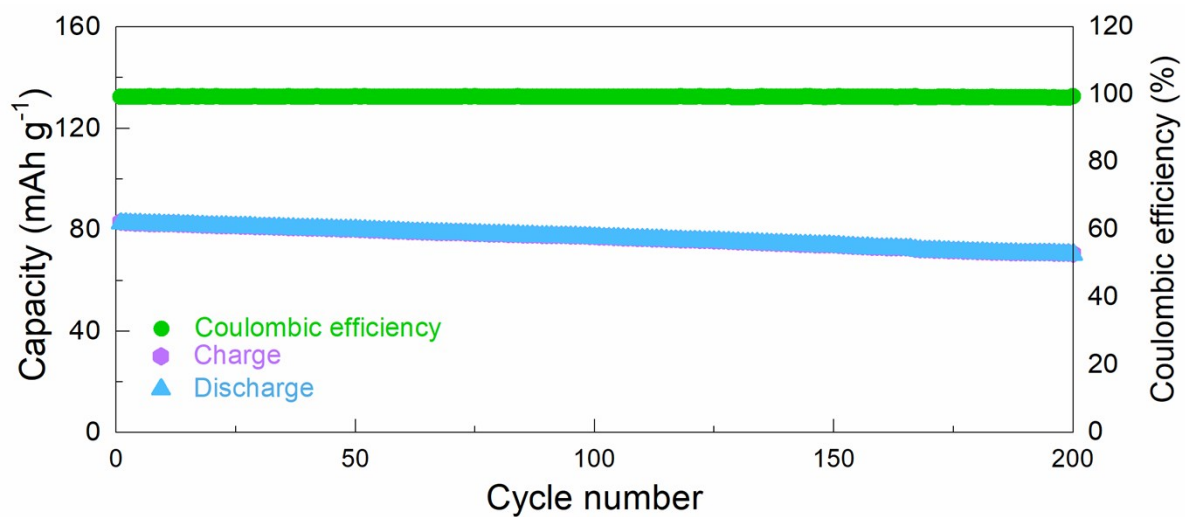

**Fig. S8.** Cycle performance of  $\text{K}_4[\text{Mn}_2\text{Fe}](\text{PO}_4)_2(\text{P}_2\text{O}_7)$  at a high current rate of 5C for 200 cycles in the voltage range of 2.0–4.3 V (vs.  $\text{K}^+/\text{K}$ ).

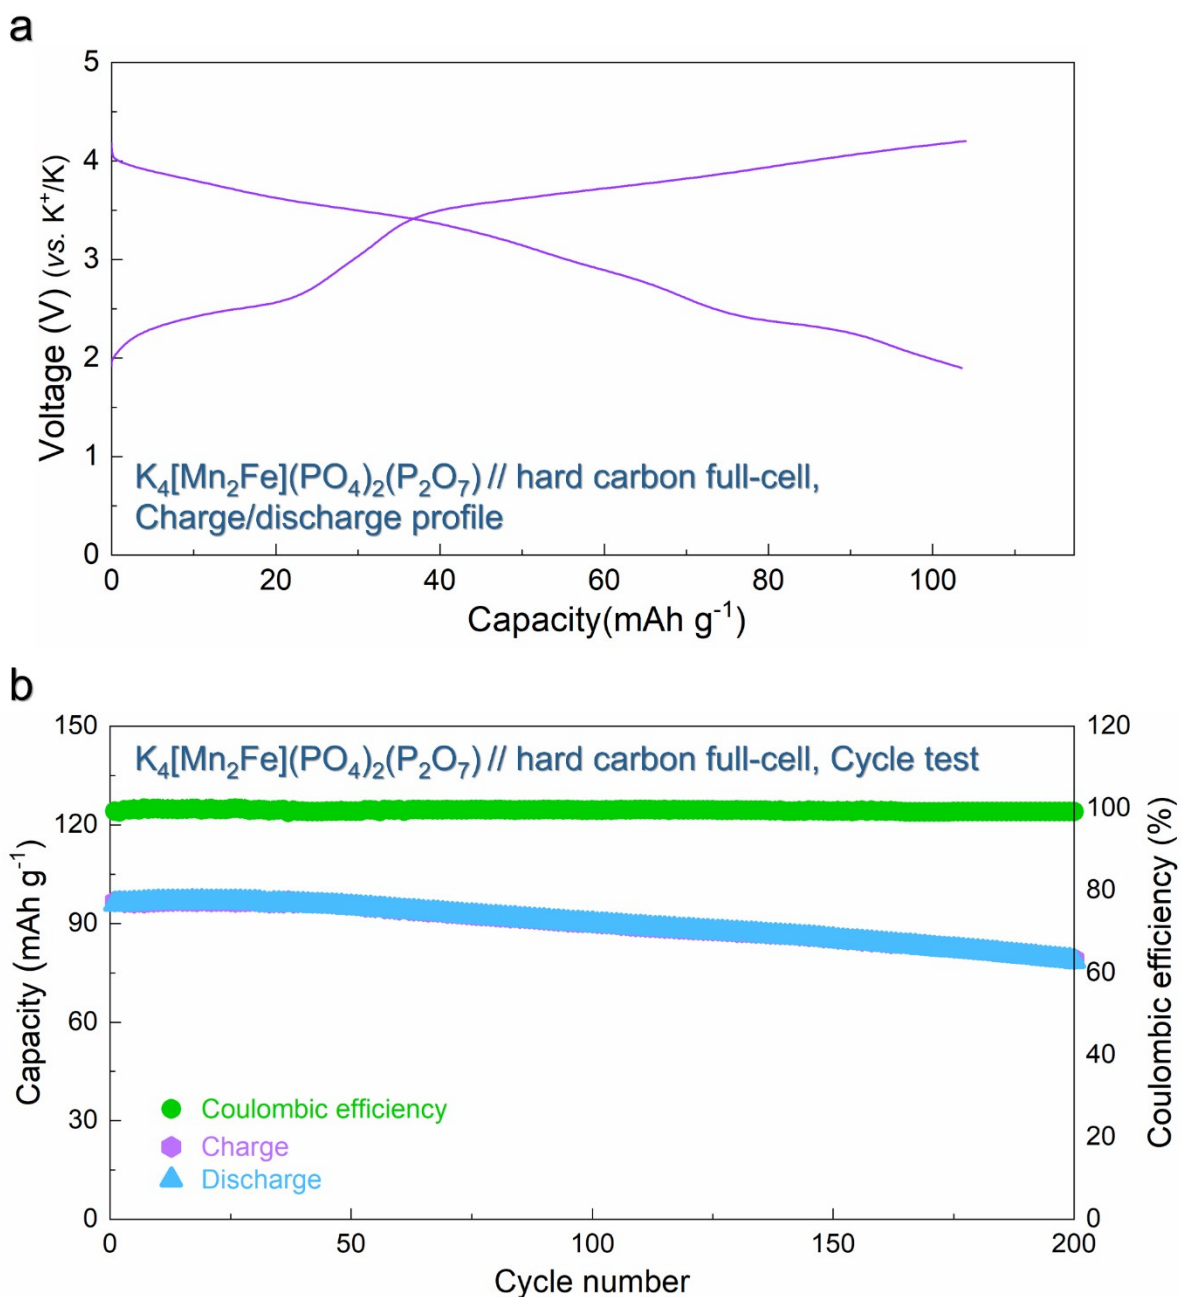

**Fig. S9.** (a) Initial charge/discharge profile of  $K_4[Mn_2Fe](PO_4)_2(P_2O_7)$ //potassiated hard-carbon full cell in the range of 1.9–4.2 V at C/20. (b) Cycling performance of  $K_4[Mn_2Fe](PO_4)_2(P_2O_7)$ //potassiated hard-carbon full cell at C/5 over 200 cycles.

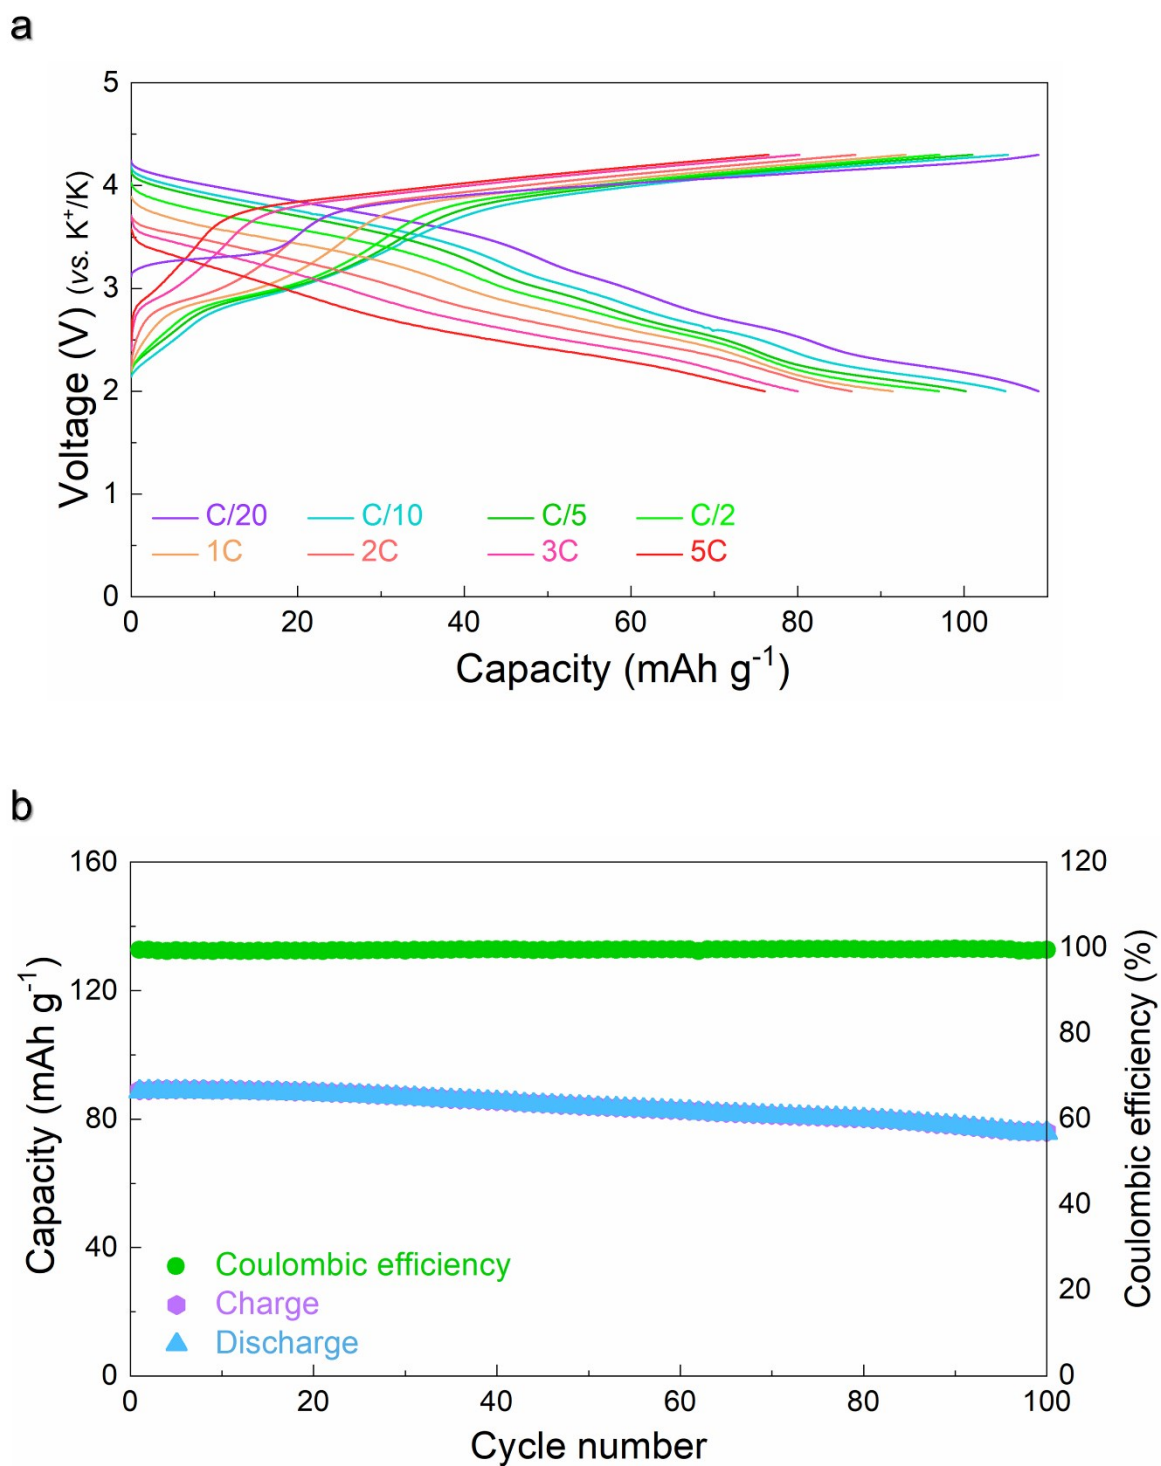

**Fig. S10.** (a) Power-capability and (b) cycle performance of  $\text{Na}_4[\text{Mn}_2\text{Fe}](\text{PO}_4)_2(\text{P}_2\text{O}_7)$  in the voltage range of 2.0–4.3 V (vs.  $\text{K}^+/\text{K}$ ) under the KIB system.

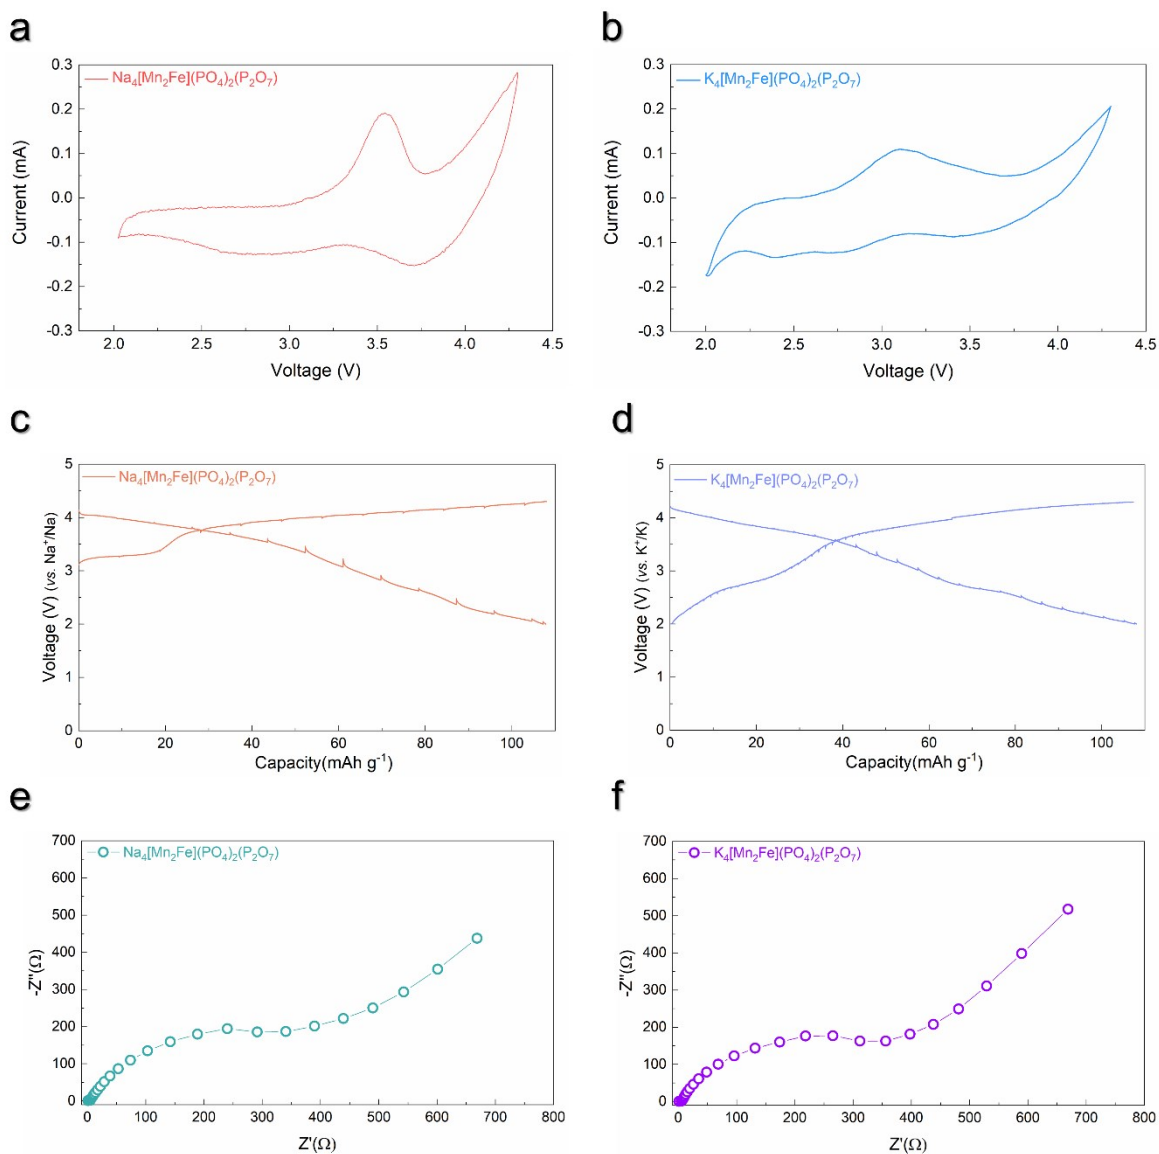

**Fig. S11.** CV profiles of the (a)  $\text{Na}_4[\text{Mn}_2\text{Fe}](\text{PO}_4)_2(\text{P}_2\text{O}_7)$  and (b)  $\text{K}_4[\text{Mn}_2\text{Fe}](\text{PO}_4)_2(\text{P}_2\text{O}_7)$  electrode measured at scan rate of  $1 \text{ mV s}^{-1}$ . GITT profiles of (c)  $\text{Na}_4\text{Mn}_2\text{Fe}(\text{PO}_4)_2(\text{P}_2\text{O}_7)$  and (d)  $\text{K}_4[\text{Mn}_2\text{Fe}](\text{PO}_4)_2(\text{P}_2\text{O}_7)$  at a current rate of  $C/10$  ( $1C = 117 \text{ mA g}^{-1}$ ). EIS profiles of (e)  $\text{Na}_4[\text{Mn}_2\text{Fe}](\text{PO}_4)_2(\text{P}_2\text{O}_7)$  and (f)  $\text{K}_4[\text{Mn}_2\text{Fe}](\text{PO}_4)_2(\text{P}_2\text{O}_7)$ . The experiments above were performed under the KIB system.

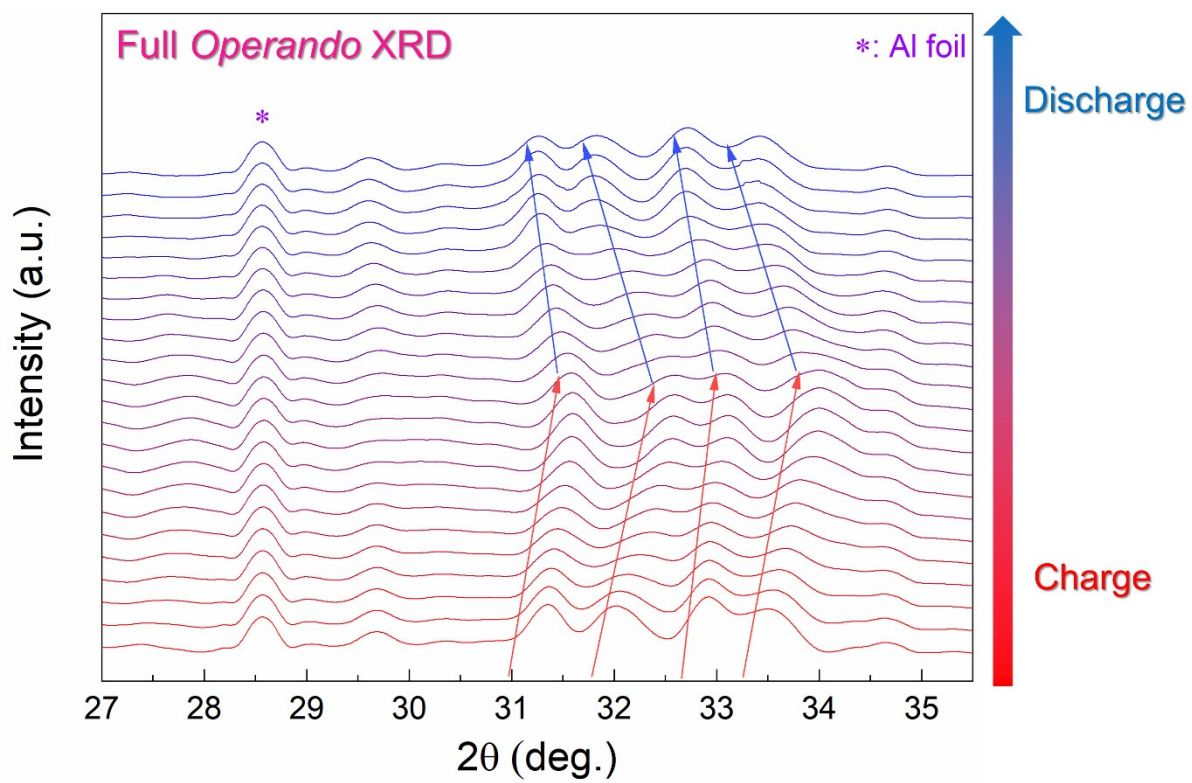

**Fig. S12.** Full *operando* XRD patterns of  $K_x[Mn_2Fe](PO_4)_2(P_2O_7)$  ( $1.2 \leq x \leq 4.0$ ) between  $27^\circ$  and  $35.5^\circ$ .

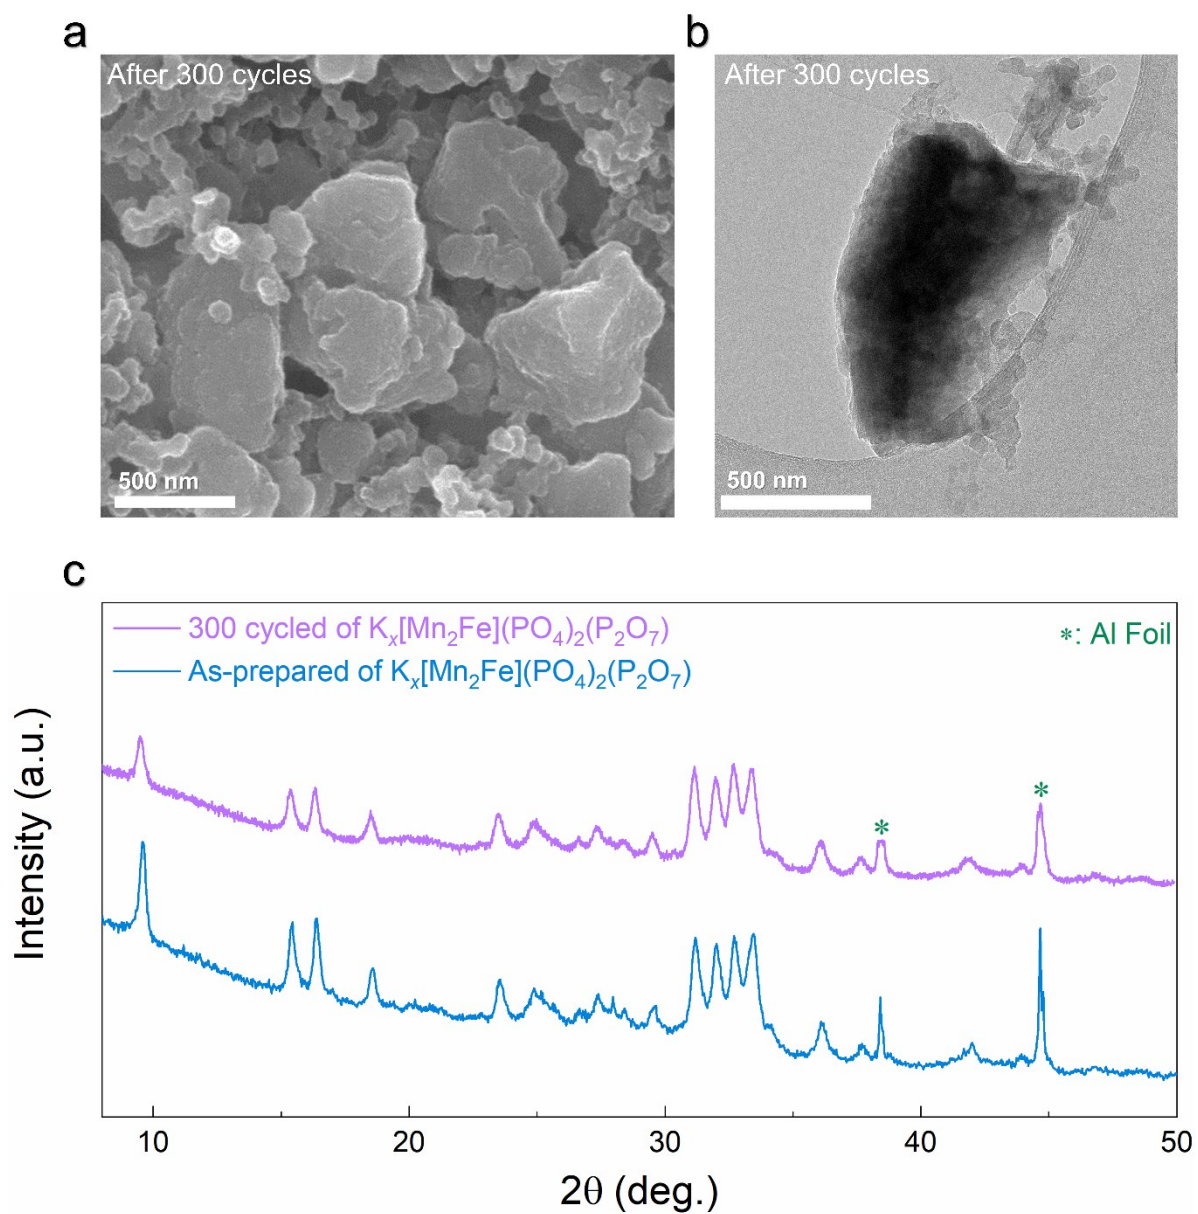

**Fig. S13.** (a) SEM image, (b) TEM image, and (c) XRD patterns of  $K_x[Mn_2Fe](PO_4)_2(P_2O_7)$  ( $1.2 \leq x \leq 4.0$ ) electrode after cycling for 300 cycles in the range of  $8^\circ$ – $50^\circ$ .

|                                                                                                              | <b>Na</b>    | <b>Mn</b>    | <b>Fe</b>    | <b>K</b>     |
|--------------------------------------------------------------------------------------------------------------|--------------|--------------|--------------|--------------|
| <b>Na<sub>4</sub>[Mn<sub>2</sub>Fe](PO<sub>4</sub>)<sub>2</sub>(P<sub>2</sub>O<sub>7</sub>)</b>              | <b>3.997</b> | <b>2.004</b> | <b>1.000</b> | <b>0</b>     |
| <b>K<sub>3</sub>Na<sub>1</sub>[Mn<sub>2</sub>Fe](PO<sub>4</sub>)<sub>2</sub>(P<sub>2</sub>O<sub>7</sub>)</b> | <b>1.004</b> | <b>2.003</b> | <b>1.000</b> | <b>2.992</b> |
| <b>K<sub>4</sub>[Mn<sub>2</sub>Fe](PO<sub>4</sub>)<sub>2</sub>(P<sub>2</sub>O<sub>7</sub>)</b>               | <b>0</b>     | <b>2.001</b> | <b>1.000</b> | <b>3.997</b> |

**Table S1.** ICP analyses on the atomic ratio of Na, Mn, Fe, and K of various K<sub>x</sub>Na<sub>4-x</sub>[Mn<sub>2</sub>Fe](PO<sub>4</sub>)<sub>2</sub>(P<sub>2</sub>O<sub>7</sub>) phases formed during the ion-exchange process from Na<sub>4</sub>[Mn<sub>2</sub>Fe](PO<sub>4</sub>)<sub>2</sub>(P<sub>2</sub>O<sub>7</sub>) to K<sub>4</sub>[Mn<sub>2</sub>Fe](PO<sub>4</sub>)<sub>2</sub>(P<sub>2</sub>O<sub>7</sub>).

| <b>Sample</b>                                                                                   | <b><i>a</i></b> | <b><i>b</i></b> | <b><i>c</i></b> | <b>Volume</b> |
|-------------------------------------------------------------------------------------------------|-----------------|-----------------|-----------------|---------------|
| <b>Na<sub>4</sub>[Mn<sub>2</sub>Fe](PO<sub>4</sub>)<sub>2</sub>(P<sub>2</sub>O<sub>7</sub>)</b> | 17.9526(4)      | 6.6018(2)       | 10.7312(4)      | 1271.87(5)    |
| <b>K<sub>4</sub>[Mn<sub>2</sub>Fe](PO<sub>4</sub>)<sub>2</sub>(P<sub>2</sub>O<sub>7</sub>)</b>  | 18.2501(7)      | 6.6450(2)       | 11.1393(4)      | 1350.89(9)    |

**Table S2.** Comparison of lattice parameters and volume of Na<sub>4</sub>[Mn<sub>2</sub>Fe](PO<sub>4</sub>)<sub>2</sub>(P<sub>2</sub>O<sub>7</sub>) and K<sub>4</sub>[Mn<sub>2</sub>Fe](PO<sub>4</sub>)<sub>2</sub>(P<sub>2</sub>O<sub>7</sub>).



| Atom | Wyckoff Position | x          | y          | z          | B <sub>iso</sub> | Occupancy |
|------|------------------|------------|------------|------------|------------------|-----------|
| K1   | 4a               | 0.5000(13) | 0.751(2)   | 0.9780(16) | 0.95(9)          | 0.83328   |
| K2   | 4a               | 0.2891(8)  | 0.8530(18) | 0.7792(17) | 0.95(9)          | 1.00000   |
| K3   | 4a               | 0.3940(7)  | 0.4219(16) | 0.259(3)   | 0.95(14)         | 0.98185   |
| K4   | 4a               | 0.4875(10) | 0.714(2)   | 0.5481(16) | 0.95(18)         | 0.80000   |
| Fe1  | 4a               | 0.3398(4)  | 0.091(3)   | 0.5018(12) | 1.20(6)          | 0.33330   |
| Fe2  | 4a               | 0.1367(4)  | 0.594(4)   | 0.4862(12) | 1.20(6)          | 0.33330   |
| Fe3  | 4a               | 0.2415(6)  | 0.316(2)   | 0.753(2)   | 1.20(6)          | 0.33330   |
| Mn1  | 4a               | 0.3398(4)  | 0.091(3)   | 0.5018(12) | 1.20(6)          | 0.66670   |
| Mn2  | 4a               | 0.1367(4)  | 0.594(4)   | 0.4862(12) | 1.20(6)          | 0.66670   |
| Mn3  | 4a               | 0.2415(6)  | 0.316(2)   | 0.753(2)   | 1.20(6)          | 0.66670   |
| O1   | 4a               | 0.2440(19) | 0.568(9)   | 0.596(3)   | 0.99(14)         | 1.00000   |
| O2   | 4a               | 0.3560(17) | 0.431(5)   | 0.487(4)   | 0.99(14)         | 1.00000   |
| O3   | 4a               | 0.3500(17) | 0.768(5)   | 0.533(3)   | 0.99(14)         | 1.00000   |
| O4   | 4a               | 0.2508(19) | 0.592(8)   | 0.393(3)   | 0.99(14)         | 1.00000   |
| O5   | 4a               | 0.2307(18) | 0.099(9)   | 0.607(3)   | 0.99(14)         | 1.00000   |
| O6   | 4a               | 0.1239(16) | -0.110(5)  | 0.498(3)   | 0.99(14)         | 1.00000   |
| O7   | 4a               | 0.2369(19) | 0.042(7)   | 0.378(3)   | 0.99(14)         | 1.00000   |
| O8   | 4a               | 0.1314(15) | 0.263(5)   | 0.453(3)   | 0.99(14)         | 1.00000   |
| O9   | 4a               | 0.4833(19) | 0.359(6)   | 0.706(3)   | 0.99(14)         | 1.00000   |
| O10  | 4a               | 0.5486(20) | 0.551(7)   | 0.853(3)   | 0.99(14)         | 1.00000   |
| O11  | 4a               | 0.6241(14) | 0.296(4)   | 0.739(6)   | 0.99(14)         | 1.00000   |
| O12  | 4a               | 0.5775(19) | 0.601(8)   | 0.643(3)   | 0.99(14)         | 1.00000   |
| O13  | 4a               | 0.4658(19) | 0.095(8)   | 0.864(3)   | 0.99(14)         | 1.00000   |
| O14  | 4a               | 0.3676(15) | 0.175(5)   | 0.713(3)   | 0.99(14)         | 1.00000   |
| O15  | 4a               | 0.480(2)   | -0.007(6)  | 0.624(3)   | 0.99(14)         | 1.00000   |
| P1   | 4a               | 0.3016(8)  | 0.584(5)   | 0.502(2)   | 0.57(10)         | 1.00000   |
| P2   | 4a               | 0.1774(8)  | 0.085(6)   | 0.490(2)   | 0.57(10)         | 1.00000   |
| P3   | 4a               | 0.5596(7)  | 0.4579(17) | 0.743(4)   | 0.57(10)         | 1.00000   |
| P4   | 4a               | 0.4448(8)  | 0.156(2)   | 0.749(3)   | 0.57(10)         | 1.00000   |

Ta

**ble S3.** Detailed structural information for  $K_4[Mn_2Fe](PO_4)_2(P_2O_7)$  obtained through Rietveld refinement.

| Active Materials                                                                                    | Electrolyte                                  | Voltage Range (V) | Specific Capacity (mAh g <sup>-1</sup> ) | Cycle Retention (%) | Experimental condition                 | Ref.      |
|-----------------------------------------------------------------------------------------------------|----------------------------------------------|-------------------|------------------------------------------|---------------------|----------------------------------------|-----------|
| K <sub>4</sub> [Mn <sub>2</sub> Fe](PO <sub>4</sub> ) <sub>2</sub> (P <sub>2</sub> O <sub>7</sub> ) | 0.5 M KPF <sub>6</sub> in EC:DEC (1:1 v/v%)  | 2.0-4.3           | 110.0                                    | 83.0                | 300 cycles at 39.0 mA g <sup>-1</sup>  | This work |
| K <sub>0.45</sub> MnO <sub>2</sub>                                                                  | 0.8 M KPF <sub>6</sub> in EC:DEC (1:1 v/v%)  | 1.5-4.0           | 128.6                                    | 70.8                | 100 cycles at 20.0 mA g <sup>-1</sup>  | 38        |
| K <sub>0.7</sub> Fe <sub>0.5</sub> Mn <sub>0.5</sub> O <sub>2</sub>                                 | 0.8 M KPF <sub>6</sub> in EC:DMC (1:1 v/v%)  | 1.5-4.0           | 178.0                                    | 89.0                | 60 cycles at 100.0 mA g <sup>-1</sup>  | 39        |
| P2-K <sub>2/3</sub> [Ni <sub>1/3</sub> Mn <sub>2/3</sub> ]O <sub>2</sub>                            | 0.5 M KPF <sub>6</sub> in EC:DEC (1:1 v/v%)  | 1.5-4.5           | 82.0                                     | 96.8                | 200 cycles at 86.0 mA g <sup>-1</sup>  | 40        |
| P3-K <sub>0.54</sub> [Co <sub>0.5</sub> Mn <sub>0.5</sub> ]O <sub>2</sub>                           | 1.0 M NaClO <sub>4</sub> in EC:PC (1:1 v/v%) | 1.5-3.9           | 120.4                                    | 85.0                | 100 cycles at 20.0 mA g <sup>-1</sup>  | 41        |
| K <sub>0.5</sub> V <sub>2</sub> O <sub>5</sub>                                                      | 1.5 M KFSI in EC:DEC (1:1 v/v%)              | 1.5-3.8           | 90.0                                     | 81.0                | 250 cycles at 100.0 mA g <sup>-1</sup> | 42        |
| K <sub>3</sub> V <sub>2</sub> (PO <sub>4</sub> ) <sub>3</sub> /C                                    | 0.8 M KPF <sub>6</sub> in EC:DEC (1:1 v/v%)  | 2.5-4.3           | 54.0                                     | 81.4                | 100 cycles at 20.0 mA g <sup>-1</sup>  | 43        |
| K <sub>3</sub> V <sub>2</sub> (PO <sub>4</sub> ) <sub>2</sub> F <sub>3</sub>                        | 1.0 M KPF <sub>6</sub> in EC:PC (1:1 v/v%)   | 2.0-4.6           | 100.0                                    | 95.0                | 180 cycles at 90 mA g <sup>-1</sup>    | 44        |
| KVP <sub>2</sub> O <sub>7</sub>                                                                     | 0.5 M KPF <sub>6</sub> in EC:DEC (1:1 v/v%)  | 2.0-5.0           | 60.0                                     | 84.9                | 100 cycles at 25.0 mA g <sup>-1</sup>  | 45        |

**Table S4.** Electrochemical properties of various cathode materials for KIBs.

## Reference

- 1 R. Sawyer, H. W. Nesbitt and R. A. Secco, *J. Non. Cryst. Solids*, 2012, **358**, 290–302.
- 2 L. Liu, S. Wang, Z. Zhang, J. Fan, W. Qi and S. Chen, *Ionics (Kiel)*., 2019, **25**, 1035–1043.
